# Supplementary material for: Serum Concentrations of Organochlorine Pesticides and Growth among Russian Boys
Source: PubMed Central journal article supplement (PMC3279441; doi:10.1289/ehp.1103743), 2011-10-07
Supplement: ehp.1103743.s001.pdf [file ehp.1103743.s001.pdf]

## Supplemental Material

### Serum Levels of Organochlorine Pesticides and Growth among Russian Boys

Jane S. Burns<sup>1</sup>, Paige L. Williams<sup>2</sup>, Oleg Sergeyev<sup>3,4</sup>, Susan A. Korrick<sup>1,5</sup>, Mary M. Lee<sup>6</sup>, Boris Revich<sup>7</sup>, Larisa Altshul<sup>8,9</sup>, Julie T. Del Prato<sup>1</sup>, Olivier Humblet<sup>10</sup>, Donald G. Patterson Jr.<sup>11,12,13,14,15</sup>, Wayman E. Turner<sup>11</sup>, Mikhail Starovoytov<sup>16</sup>, Russ Hauser<sup>1</sup>

<sup>1</sup>Environmental and Occupational Medicine and Epidemiology Program, Department of Environmental Health, Harvard School of Public Health, Boston, Massachusetts, USA

<sup>2</sup>Department of Biostatistics, Harvard School of Public Health, Boston, Massachusetts, USA

<sup>3</sup>Department of Physical Education and Health, Samara State Medical University, Samara, Russia

<sup>4</sup>Chapaevsk Medical Association, Chapaevsk, Russia

<sup>5</sup>Channing Laboratory, Department of Medicine, Brigham and Women's Hospital, Harvard Medical School, Boston, Massachusetts, USA

<sup>6</sup>Pediatric Endocrine Division, Departments of Pediatrics and Cell Biology, University of Massachusetts Medical School, Worcester, Massachusetts, USA

<sup>7</sup>Department of Environmental Health, Institute for Forecasting, Russian Academy of Sciences, Moscow, Russia

<sup>8</sup>Environmental Health and Engineering, Inc., Needham, Massachusetts, USA

<sup>9</sup>Exposure, Epidemiology, and Risk Program, Department of Environmental Health, Harvard School of Public Health, Boston, Massachusetts, USA

<sup>10</sup>Division of Immunology and Allergy, Department of Pediatrics, Stanford University, Stanford, California, USA

<sup>11</sup>Centers for Disease Control and Prevention, Atlanta, Georgia, USA

<sup>12</sup>EnviroSolutions Consulting, Inc., Auburn, Georgia, USA

<sup>13</sup>Axys Analytical Solutions, Sidney, British Columbia, Canada

<sup>14</sup>Fluid Management Systems, Boston, Massachusetts, USA

<sup>15</sup>Exponent, Inc., Maynard, Massachusetts, USA

<sup>16</sup>Russian Institute of Nutrition, Moscow, Russia

Table of Contents:

Supplemental Table 1

Supplemental Table 2

Supplemental Material, Table 1. Univariate associations of serum organochlorine pesticides with measures of growth over 4 years of follow-up in boys from the Russian Children's Study<sup>a</sup> (N=350)

| Growth measure/<br>quintiles of exposure                  | HCB <sup>b</sup>     |         | $\beta$ HCH <sup>c</sup> |         | p,p'-DDE <sup>d</sup> |         |
|-----------------------------------------------------------|----------------------|---------|--------------------------|---------|-----------------------|---------|
|                                                           | Estimate (95% CI)    | p-Value | Estimate (95% CI)        | p-Value | Estimate (95% CI)     | p-Value |
| Annual WHO age-adjusted BMI z-scores ( <i>n</i> = 345)    |                      |         |                          |         |                       |         |
| Quintile 1 (lowest)                                       | Reference            |         | Reference                |         | Reference             |         |
| Quintile 2                                                | -0.32 (-0.71, 0.07)  | 0.11    | -0.51 (-0.89, -0.13)     | 0.008   | -0.67 (-1.06, -0.29)  | <0.001  |
| Quintile 3                                                | -0.73 (-1.12, -0.35) | <0.001  | -1.08 (-1.46, -0.70)     | <0.001  | -1.06 (-1.45, -0.68)  | <0.001  |
| Quintile 4                                                | -1.27 (-1.66, -0.88) | <0.001  | -1.37 (-1.75, -1.00)     | <0.001  | -1.15 (-1.54, -0.76)  | <0.001  |
| Quintile 5 (highest)                                      | -0.95 (-1.34, -0.57) | <0.001  | -1.30 (-1.68, -0.93)     | <0.001  | -1.34 (-1.72, -0.95)  | <0.001  |
| Trend test                                                |                      | <0.001  |                          | <0.001  |                       | <0.001  |
| Annual WHO age-adjusted height z-scores ( <i>n</i> = 345) |                      |         |                          |         |                       |         |
| Quintile 1 (lowest)                                       | Reference            |         | Reference                |         | Reference             |         |
| Quintile 2                                                | -0.25 (-0.58, 0.07)  | 0.13    | -0.28 (-0.60, 0.04)      | 0.08    | -0.25 (-0.57, 0.06)   | 0.12    |
| Quintile 3                                                | -0.11 (-0.43, 0.22)  | 0.52    | -0.28 (-0.60, 0.05)      | 0.09    | -0.19 (-0.50, 0.13)   | 0.25    |
| Quintile 4                                                | -0.39 (-0.71, 0.06)  | 0.02    | -0.59 (-0.91, -0.28)     | <0.001  | -0.59 (-0.91, -0.28)  | <0.001  |
| Quintile 5 (highest)                                      | -0.37 (-0.69, 0.05)  | 0.02    | -0.43 (-0.75, -0.10)     | 0.01    | -0.78 (-1.09, -0.46)  | <0.001  |
| Trend test                                                |                      | 0.02    |                          | 0.001   |                       | <0.001  |
| Annual height velocity ( <i>n</i> = 329) <sup>e</sup>     |                      |         |                          |         |                       |         |
| Quintile 1 (lowest)                                       | Reference            |         | Reference                |         | Reference             |         |
| Quintile 2                                                | 0.10 (-0.10, 0.30)   | 0.32    | -0.08 (-0.28, 0.12)      | 0.41    | -0.14 (-0.34, 0.06)   | 0.18    |
| Quintile 3                                                | 0.03 (-0.17, 0.22)   | 0.78    | 0.03 (-0.17, 0.23)       | 0.76    | -0.02 (-0.23, 0.18)   | 0.82    |
| Quintile 4                                                | -0.13 (-0.33, 0.07)  | 0.20    | -0.22 (-0.42, -0.03)     | 0.03    | -0.22 (-0.42, -0.02)  | 0.03    |
| Quintile 5 (highest)                                      | -0.10 (-0.30, 0.11)  | 0.35    | -0.07 (-0.27, 0.13)      | 0.50    | -0.23 (-0.43, -0.03)  | 0.02    |
| Trend test                                                |                      | 0.07    |                          | 0.20    |                       | 0.02    |

<sup>a</sup>Mixed effects repeated measures regression model without adjustment for other covariates.

<sup>b</sup>HCB quintiles (Q1-Q5, ng/g lipid): Q1 31 – 98; Q2 99 -135; Q3 136 – 184; Q4 185 - 282; Q5 283 – 2660;

<sup>c</sup> $\beta$ HCH quintiles (Q1-Q5, ng/g lipid): Q1 39 – 104; Q2 105 – 144; Q3 145 – 196; Q4 197 – 302; Q5 303 – 2860;

<sup>d</sup>p,p'-DDE quintiles (Q1-Q5, ng/g lipid): Q1 48 – 172; Q2 173 – 246; Q3 247 – 354; Q4 355 – 549; Q5 550 – 9370

<sup>e</sup>Reduced number since at least 2 consecutive measures are required for calculation of change in height (e.g. height velocity).

Supplemental Material, Table 2: Associations of serum organochlorine pesticides (OCPs) with measures of growth over 4 years of follow-up in boys from the Russian Children's Study<sup>a</sup> including all OCPs simultaneously (N=350)

| Growth measure/<br>quintile of exposure           | HCB <sup>b</sup>     |         | βHCH <sup>c</sup>    |         | p,p'-DDE <sup>d</sup> |         |
|---------------------------------------------------|----------------------|---------|----------------------|---------|-----------------------|---------|
|                                                   | Estimate (95% CI)    | p-Value | Estimate (95% CI)    | p-Value | Estimate (95% CI)     | p-Value |
| Annual WHO age-adjusted BMI z-scores (n = 345)    |                      |         |                      |         |                       |         |
| Quintile 1 (lowest)                               | Reference            |         | Reference            |         | Reference             |         |
| Quintile 2                                        | -0.06 (-0.42, 0.30)  | 0.74    | -0.30 (-0.67, 0.07)  | 0.11    | -0.41 (-0.78, -0.05)  | 0.03    |
| Quintile 3                                        | -0.30 (-0.67, 0.07)  | 0.11    | -0.72 (-1.12, -0.32) | <0.001  | -0.80 (-1.18, -0.43)  | <0.001  |
| Quintile 4                                        | -0.73 (-1.13, -0.33) | <0.001  | -0.72 (-1.15, -0.29) | 0.001   | -0.48 (-0.88, -0.07)  | 0.02    |
| Quintile 5 (highest)                              | -0.26 (-0.68, 0.15)  | 0.21    | -0.70 (-1.17, -0.22) | 0.004   | -0.74 (-1.17, -0.30)  | 0.001   |
| Trend test                                        |                      | 0.02    |                      | <0.001  |                       | 0.002   |
| Annual WHO age-adjusted height z-scores (n = 345) |                      |         |                      |         |                       |         |
| Quintile 1 (lowest)                               | Reference            |         | Reference            |         | Reference             |         |
| Quintile 2                                        | -0.22 (-0.52, 0.08)  | 0.50    | -0.06 (-0.37, 0.25)  | 0.69    | -0.21 (-0.51, 0.10)   | 0.18    |
| Quintile 3                                        | -0.04 (-0.27, 0.34)  | 0.35    | -0.001 (-0.33, 0.33) | 0.99    | -0.22 (-0.54, 0.09)   | 0.17    |
| Quintile 4                                        | -0.16 (-0.49, 0.18)  | 0.81    | -0.08 (-0.44, -.28)  | 0.67    | -0.50 (-0.83, -0.15)  | 0.005   |
| Quintile 5 (highest)                              | -0.12 (-0.46, 0.23)  | 0.15    | -0.19 (-0.21, 0.58)  | 0.36    | -0.73 (-1.10, -0.37)  | <0.001  |
| Trend test                                        |                      | 0.69    |                      | 0.45    |                       | <0.001  |
| Annual height velocity (n=329) <sup>e</sup>       |                      |         |                      |         |                       |         |
| Quintile 1 (lowest)                               | Reference            |         | Reference            |         | Reference             |         |
| Quintile 2                                        | 0.11 (-0.10, 0.31)   | 0.33    | -0.02 (-0.23, 0.19)  | 0.89    | -0.14 (-0.35, 0.07)   | 0.19    |
| Quintile 3                                        | 0.04 (-0.17, 0.25)   | 0.72    | 0.11 (-0.12, 0.34)   | 0.33    | -0.05 (-0.27, 0.16)   | 0.64    |
| Quintile 4                                        | -0.06 (-0.29, 0.17)  | 0.59    | 0.003 (-0.24, 0.25)  | 0.11    | -0.23 (-0.47, 0.00)   | 0.05    |
| Quintile 5 (highest)                              | -0.08 (-0.31, 0.16)  | 0.51    | 0.17 (-0.11, 0.44)   | 0.22    | -0.27 (-0.52, -0.02)  | 0.03    |
| Trend test                                        |                      | 0.26    |                      | 0.26    |                       | 0.04    |

<sup>a</sup>Mixed effects repeated measures regression model adjusted for age, birthweight, gestational age, household income, total calories consumed, percent calories from carbohydrate, protein, and fat, BLL, and all OCPs.

<sup>b</sup>HCB quintiles (Q1-Q5, ng/g lipid): Q1 31 – 98; Q2 99 -135; Q3 136 – 184; Q4 185 - 282; Q5 283 – 2660;

<sup>c</sup>βHCH quintiles (Q1-Q5, ng/g lipid): Q1 39 – 104; Q2 105 – 144; Q3 145 – 196; Q4 197 – 302; Q5 303 – 2860;

<sup>d</sup>p,p'-DDE quintiles (Q1-Q5, ng/g lipid): Q1 48 – 172; Q2 173 – 246; Q3 247 – 354; Q4 355 – 549; Q5 550 – 9370

<sup>e</sup>Reduced number since at least 2 consecutive measures are required for calculation of change in height (e.g. height velocity).
